1 **SARS-CoV-2 bearing a mutation at the S1/S2 cleavage site exhibits attenuated**  
2 **virulence and confers protective immunity**

3

4 Michihito Sasaki<sup>1\*</sup>, Shinsuke Toba<sup>1,2</sup>, Yukari Itakura<sup>1</sup>, Herman M. Chambaro<sup>1</sup>, Mai  
5 Kishimoto<sup>1</sup>, Koshiro Tabata<sup>1</sup>, Kittiya Intaruck<sup>1</sup>, Kentaro Uemura<sup>1,2,3</sup>, Takao Sanaki<sup>1,2</sup>,  
6 Akihiko Sato<sup>1,2</sup>, William W. Hall<sup>4,5,6</sup>, Yasuko Orba<sup>1,4</sup> and Hirofumi Sawa<sup>1,4,6,7</sup>

7

8 <sup>1</sup>Division of Molecular Pathobiology, International Institute for Zoonosis Control,  
9 Hokkaido University, Sapporo, Japan

10 <sup>2</sup>Shionogi & Co., Ltd., Osaka, Japan

11 <sup>3</sup>Laboratory of Biomolecular Science, Faculty of Pharmaceutical Science, Hokkaido  
12 University, Sapporo, Japan

13 <sup>4</sup>International Collaboration Unit, International Institute for Zoonosis Control, Hokkaido  
14 University, Sapporo, Japan

15 <sup>5</sup>National Virus Reference Laboratory, School of Medicine, University College of Dublin,  
16 Ireland

17 <sup>6</sup>Global Virus Network, Baltimore, Maryland, USA

18 <sup>7</sup>One Health Research Center, Hokkaido University

19

20 \*Corresponding author:

21 Michihito Sasaki, E-mail: m-sasaki@czc.hokudai.ac.jp

22

## 23 **Abstract**

24        Severe Acute Respiratory Syndrome-Coronavirus-2 (SARS-CoV-2) possesses a  
25        discriminative polybasic cleavage motif in its spike protein that is recognized by host furin  
26        protease. Proteolytic cleavage activates the spike protein and influences both the cellular  
27        entry pathway and cell tropism of SARS-CoV-2. Here, we investigated the impact of the  
28        furin cleavage site on viral growth and pathogenesis using a hamster animal model infected  
29        with SARS-CoV-2 variants bearing mutations at the furin cleavage site (S gene mutants).  
30        In the airway tissues of hamsters, the S gene mutants exhibited a low growth property. In  
31        contrast to parental pathogenic SARS-CoV-2, hamsters infected with the S gene mutants  
32        showed no body weight loss and only a mild inflammatory response, indicating the  
33        attenuated variant nature of S gene mutants. We reproduced the attenuated growth of S  
34        gene mutants in primary differentiated human airway epithelial cells. This transient  
35        infection was enough to induce protective neutralizing antibodies crossreacting with  
36        different SARS-CoV-2 lineages. Consequently, hamsters inoculated with S gene mutants  
37        showed resistance to subsequent infection with both the parental strain and the currently  
38        emerging SARS-CoV-2 variants belonging to lineages B.1.1.7 and P.1. Together, our  
39        findings revealed that the loss of the furin cleavage site causes attenuation in the airway  
40        tissues of SARS-CoV-2 and highlights the potential benefits of S gene mutants as potential  
41        immunogens.

42

## 43 **Introduction**

44 Severe Acute Respiratory Syndrome-Coronavirus-2 (SARS-CoV-2) causes an  
45 infectious respiratory disease in humans, COVID-19. Patients with severe COVID-19  
46 pneumonia exhibit high expression levels of pro-inflammatory cytokines, the so-called  
47 cytokine storm, leading to hyper-inflammation with tissue damage. Particularly, interleukin  
48 6 (IL-6) plays a pivotal role in the hyper-inflammatory response during the acute phase of  
49 viral infection and is associated with the disease severity [1, 2]. During the global spread of  
50 SARS-CoV-2, variants carrying adaptive mutations in their spike gene have been identified  
51 in different countries, raising global concerns about disease severity, transmissibility, and  
52 escape from immunity against the ancestral SARS-CoV-2 [3-5].

53 Syrian hamsters and non-human primates are highly susceptible to the infection of  
54 SARS-CoV-2 and develop pneumonia with profound inflammatory responses [6-10].  
55 Transgenic mice expressing human-ACE2 and mouse transduced human-ACE2 have also  
56 been used to investigate SARS-CoV-2 infection; however, due to the inaccessibility of  
57 mouse ACE2 [11-13], laboratory mice are resistant to infection with clinical SARS-CoV-2  
58 strains. These animals recover from the transient infection, acquiring protective neutralizing  
59 antibodies [10, 11]. Currently, hamsters are widely used as an animal model to study  
60 pathogenicity, host immune responses, and the development of vaccines and antiviral drugs  
61 [14, 15].

62 The spike (S) protein of SARS-CoV-2 is a homotrimeric glycoprotein located on the  
63 virion surface and this plays a major role in virus entry into target cells by binding to  
64 specific entry receptors [16]. The S protein possesses a discriminative polybasic cleavage

65 motif at the S1/S2 boundary which is recognized by the host furin protease and required for  
66 S protein cleavage into S1 and S2 subunits [13, 17, 18]. Importantly, this proteolytic  
67 cleavage influences the viral entry pathway (direct fusion or endocytosis) and cell tropism  
68 [17, 18]. However, our previous findings and those from other research groups suggest that  
69 SARS-CoV-2 variants bearing mutations at the furin cleavage site can be selected  
70 following passaging in Vero cells [18-25]. Although these mutants were well characterized  
71 by cell-based assays, the role of the furin cleavage site in cell tropism and pathogenicity *in*  
72 *vivo* remains to be elucidated. Notably, the loss of the furin cleavage site results in the  
73 attenuation of pathogenicity of SARS-CoV-2 in hamsters and human-ACE2 transgenic  
74 mice [13, 19, 25].

75 Here we characterized *in vivo* growth and pathogenicity of SARS-CoV-2 S gene  
76 mutants bearing deletions or substitutions at the furin cleavage sites of their S proteins [18],  
77 using a hamster model. We examined the attenuation and mild inflammatory response  
78 following infection with the S gene mutants by histopathology and cytokine expression  
79 analysis. Hamsters infected with the attenuated mutants developed neutralizing antibodies  
80 crossreacting with different lineages of SARS-CoV-2; we therefore examined whether the  
81 primary infection with an S gene mutant could protect hamster recipients from both  
82 reinfection with parental pathogenic SARS-CoV-2 and currently emerging SARS-CoV-2  
83 variants belonging to lineages B.1.1.7 and P.1.

84

## 85 **Results**

### 86 **Low growth properties of SARS-CoV-2 S gene mutants in Syrian hamsters**

87 Syrian hamsters experimentally infected with SARS-CoV-2 via the intranasal route  
88 generally lose body weight until 6–7 days post infection (dpi) [7-10]. To examine the  
89 susceptibility of infection by S gene mutants, we inoculated hamsters with a clinical isolate  
90 of SARS-CoV-2, WK-521 (wild-type, WT) or S gene mutants (del2 and R685H) (Fig. 1A)  
91 [18]. Hamsters infected with WT virus showed body weight loss at 2–6 dpi, but infection  
92 with S gene mutants had no impact on the hamster body weight (Fig. 1B). The viral load of  
93 SARS-CoV-2 in hamsters reportedly decreased at 5–7 dpi [7-10]. We therefore harvested  
94 nasal turabinate and lung tissues at 4 dpi for quantification of infectious SARS-CoV-2 and  
95 its RNA. In the nasal turbinates, infectious virus titers of S gene mutants were 2–6 fold  
96 lower than those of the WT virus, whereas no difference in viral RNA levels was observed  
97 by qRT-PCR (Fig. 1C and 1D). In the lungs, the difference in growth properties between  
98 WT and S gene mutants was markedly more evident. S gene mutants produced 12–100-  
99 fold lower levels of infectious virus and viral RNA levels of S gene mutants were  
100 significantly lower than those of the WT virus (Fig. 1E and 1F). These results suggest that  
101 the S gene mutants have low pathogenicity in hamsters and have low growth capacity in  
102 hamster respiratory tissues.

103

#### 104 **Histopathology and cytokine profiles in the lungs of hamsters infected with** 105 **SARS-CoV-2 S gene mutants**

106 We then examined gross and histological changes in the lungs of hamsters inoculated  
107 with the SARS-CoV-2 S gene mutants. On gross examination, focal pulmonary  
108 consolidations and hyperemia were observed primarily in the hilar regions of hamsters

109 infected with WT virus at 4 dpi (Fig. 2A). In contrast, in the lungs of hamsters infected  
110 with the S gene mutants, these gross pathological changes were limited or not evident (Fig.  
111 2A). Immunohistochemistry identified viral antigens in the nasal, bronchial and alveolar  
112 epithelia of hamsters at 2 dpi of both WT and S gene mutants (Fig. S1A and S1B). At 4 dpi,  
113 histopathological examination revealed pulmonary lesions with marked hemorrhage and  
114 inflammatory cell infiltration in the alveolar spaces of hamsters infected with the WT virus  
115 (Fig. 2B). In contrast, the histopathological changes of lungs inoculated with the S gene  
116 mutants were relatively mild compared to those of lungs inoculated with the WT virus.  
117 Immunohistochemistry showed widespread viral antigen-positive cells in the lung of  
118 hamsters infected with WT virus, contrasting with the relatively limited distribution of viral  
119 antigen in the lungs infected with the S gene mutants (Fig. 2C). The inflammatory cells  
120 were composed primarily of ionized calcium-binding adaptor molecule 1 (Iba1)-positive  
121 macrophages (Fig. 2C), which are thought to induce severe immune damage, consistent  
122 with observations in severe cases of COVID-19 [26, 27]. Notably, only limited  
123 inflammatory cell infiltration was observed in the lungs infected with S gene mutants (Fig.  
124 2C).

125 In accordance with human COVID-19, experimental infection with SARS-CoV-2 also  
126 induced pro-inflammatory cytokine responses leading to extensive inflammatory cell  
127 infiltration in hamsters and mice [8, 12, 28]. We examined the cytokine expression levels of  
128 the hamster lungs of WT and S gene mutants at 4 dpi by qRT-PCR. WT-infection  
129 significantly upregulated the expression of IFN $\gamma$ , IL-6, IL-10 and CXCL10 (also known as  
130 IP-10) in the lungs compared to that in S gene mutants (Fig. 2D–2G). These results indicate

131 that infection with S gene mutants resulted in an attenuated inflammatory response in the  
132 lungs of the hamsters.

133

### 134 **Low growth property of SARS-CoV-2 S gene mutants in primary human airway** 135 **epithelium**

136 We further evaluated the growth property of S gene mutants in human airway  
137 epithelium using 3D reconstituted human nasal or bronchial epithelial cell models (nasal  
138 ECs or bronchial ECs, respectively) cultured at an air-liquid interface [29]. In control Vero  
139 E6 cells, the progeny virus titers and viral RNA levels of S gene mutants were equivalent to  
140 or higher than those of the WT virus (Fig. 3A and 3B). In contrast, the replication and  
141 growth of S gene mutants were impaired in human nasal ECs and bronchial ECs (Fig.  
142 3C–F), consistent with the different growth properties of WT and S gene mutants in the  
143 hamster respiratory airway.

144

### 145 **Infection of SARS-CoV-2 S gene mutants induces protective neutralizing antibody**

146 Individuals infected with SARS-CoV-2 generally show detectable seroconversion at  
147 10–14 dpi [30]. Although the virus titers in the lungs of hamsters infected with S gene  
148 mutants were lower than those with the WT virus (Fig. 1E), both hamsters infected with  
149 either WT and those infected with the S gene mutants developed similar levels of  
150 neutralizing antibody titers at 19 dpi (Fig. 4A). To investigate the protective effect of the  
151 neutralizing antibodies, we re-challenged hamsters infected with either WT or S gene  
152 mutants with the WT virus (Fig. 4B). Hamsters inoculated with WT or S gene mutants at

153 primary infection showed no body weight loss and no macroscopic changes in the lungs  
154 following the re-challenge with the WT (WT–WT, del2-WT and R685H-WT in Fig. 4C  
155 and D). In contrast, control hamsters inoculated with PBS at the primary infection point  
156 showed marked body weight loss and macroscopic changes in the lung following secondary  
157 infection with the WT (Mock–WT in Fig. 4C and 4D). Primary infection with WT and S  
158 gene mutants prevented the proliferation of re-challenged virus and decreased viral RNA  
159 levels in nasal turbinates and lungs at 5 days post reinfection (Fig. 4E–H). In line with the  
160 inhibition of virus growth, the levels of cytokines in WT–WT, del2–WT, and  
161 R685H–WT-infected hamsters were also significantly lower than those in  
162 Mock–WT-infected hamsters (Fig. 4I–L). These results indicate that infection with the  
163 attenuated S gene mutants induced protective neutralizing antibodies and reduced disease  
164 burden during reinfection with the WT virus.

165

#### 166 **Cross-reactive antibody responses to SARS-CoV-2 variants B.1.1.7 and P.1**

167 In this study, we used S gene mutants from the SARS-CoV-2 WK-521 strain belonging  
168 to lineage A. Recently, SARS-CoV-2 variants belonging to lineages B.1.1.7 (United  
169 Kingdom), B.1.351 (South Africa), and P.1 (Brazil) have emerged. These variants possess  
170 multiple amino acid mutations in the S protein, resulting in increased transmissibility and  
171 altered reactivity against neutralizing antibodies [31–35]. We utilized SARS-CoV-2 strains  
172 TY7-501 (lineage P.1) and QK002 (lineage B.1.1.7) to test whether neutralizing antibodies  
173 induced by the infection of the S gene mutant protects from infection with different  
174 SARS-CoV-2 lineages. Hamster sera in the convalescent phase of the infection of WK-521



175 WT or S gene mutants showed neutralizing activity against both the TY7-501 and the  
176 QK002 variants (Fig. 5A and S2A), while the cross-reactivity with TY7-501 was lower  
177 than that with QK002, presumably due to the K417T, E484K and N501Y substitutions in  
178 the S protein of TY7-501 (Fig. S3) [31–35]. We next examined whether primary infection  
179 with the WK-521 del2 mutant protects from secondary infection with TY7-501 and QK002  
180 (Fig. 5B and S2B). Hamsters infected with del2 mutants developed no body weight loss  
181 (del2-TY7 in Fig. 5C and del2-QK002 in Fig. S2C) and no macroscopic changes in the  
182 lung at 5 days post reinfection with TY7-501 and QK002 (Fig. 5D and S2D). In the nasal  
183 turbinates and lungs of del2-TY7 and del2-QK002 hamsters, the virus titers were close to  
184 or below the detection limit of the plaque assay (Fig. 5E–F and S2E–F). The viral RNA  
185 levels were also decreased by primary infection with the del2 mutant (Fig. 5G–H and  
186 S2G–H). Consistent with the low level of virus, the expression levels of cytokines in  
187 del2-TY7 and del2-QK002 hamsters were significantly lower than those in naïve hamsters  
188 infected with SARS-CoV-2 variants (Mock-TY7 and Mock-QK002) (Fig. 5I–L and S2I–L).  
189 Our results indicate that infection with the S gene mutant del2 elicits cross-reactive immune  
190 responses to SARS-CoV-2 variants belonging to distinct lineages.

191

## 192 **Discussion**

193 Hamsters are vulnerable to infection with SARS-CoV-2, developing pneumonia and  
194 marked body weight loss. In this study, we experimentally infected hamsters with  
195 SARS-CoV-2 clinical strains belonging to different lineages. In contrast to clinical strains,  
196 tissue culture-adapted S gene mutants bearing mutations at the S1/S2 cleavage site had

197 limited growth capacity in hamsters, with no body weight loss and only slight lung damage,  
198 as evidenced by histopathology findings and cytokine gene expression levels. These results  
199 indicate the attenuated virulence of S gene mutants in hamsters. Other studies also reported  
200 that the loss of the furin cleavage motif at the S gene results in attenuation and ablated viral  
201 growth in hamsters and human ACE2-transgenic mice compared to the original strain [13,  
202 19, 25]. Given the data from these studies, the low viral growth rate and subsequent mild  
203 inflammatory response in the lung tissue are characteristic hallmarks of attenuated  
204 SARS-CoV-2 variants bearing mutations at the furin cleavage site.

205       The cellular entry mode of S gene mutants would account for the low growth capacity  
206 of S gene mutants in the hamster airway. In the entry phase of SARS-CoV-2 infection, the  
207 S protein is primed by host TMPRSS2 or cathepsin and facilitates membrane fusion. We  
208 observed TMPRSS2 expression in the respiratory airway and impacts on the tropism of  
209 SARS-CoV-2 [36-38]. We have reported that cellular entry of S gene mutants is triggered  
210 by the cathepsin-dependent endosome pathway but not the TMPRSS2-mediated direct viral  
211 fusion at the plasma membrane [18]. The direct fusion pathway enables SARS-CoV-2 to  
212 achieve rapid cellular entry and escape from the innate immune restriction by IFN-induced  
213 transmembrane proteins (IFITMs) [39, 40]. S gene mutants thus exhibit low infectivity in  
214 certain cell lines, including human lung-derived Calu-3 cells that permit SARS-CoV-2  
215 entry exclusively through the direct fusion pathway [17, 18]. The inability of the S gene  
216 mutants to utilize TMPRSS2 for S protein activation presumably hampers efficient virus  
217 infection and dissemination in airway epithelial cells. Nevertheless, this study demonstrated

218 that attenuated infection is sufficient to induce a protective immunity against SARS-CoV-2  
219 infection in hamsters.

220 Some attenuated virus strains—including the yellow fever virus 17D strain, measles  
221 virus Edmonston strain, poliovirus Sabin strain and varicella zoster virus Oka  
222 strain—induce protective immunity in human recipients, and have therefore been used as  
223 live-attenuated vaccines [41]. We have now demonstrated that the SARS-CoV-2 S gene  
224 mutants are attenuated variants and can induce protective immunity in hamsters. Primary  
225 infection with S gene mutants inhibited the growth of the virus in both nasal turbinates and  
226 lungs of hamsters reinfected with a pathogenic clinical strain of SARS-CoV-2. Since  
227 prophylactic administration of neutralizing IgG failed to inhibit growth of SARS-CoV-2 in  
228 nasal turbinates, this finding highlights the benefit of vaccination [42]. Moreover,  
229 inoculation with the S gene mutant del2 induced protective immunity which cross-reacted  
230 with currently emerging SARS-CoV-2 variants belonging to the lineages B.1.1.7 and P.1.,  
231 which, as a result of K417T, E484K and/or N501Y mutations at RBD in the S protein,  
232 escape neutralization by some monoclonal antibodies [31-35]. This broad neutralizing  
233 activity across different lineages indicates the potential of S gene mutants as immunogens  
234 in live-attenuated vaccine candidates, although the pathogenicity of S gene mutants in  
235 humans remains to be elucidated.

236 Nevertheless, the recombinant SARS-CoV-2 mutant lacking the furin cleavage motif  
237 ( $\Delta$ PRRA) showed low pathogenicity in human ACE2-transgenic mice as well as hamsters  
238 [13]. In humans, naturally arising SARS-CoV-2 variants lacking the furin cleavage motif  
239 have been identified as minor populations of quasispecies in clinical specimens from

240 COVID-19 patients [43]. In primary differentiated human epithelial cells, we have  
241 demonstrated the low growth properties of S gene mutants. These observations suggest that  
242 SARS-CoV-2 mutants lacking the furin cleavage site can infect human airway, albeit with  
243 low growth properties. Further *in vivo* studies using non-human primates will provides  
244 more insights on the implications and pathogenicity of S gene mutants. In conclusion, the  
245 findings in the present study show the potential of developing live-attenuated vaccines for  
246 the prevention of SARS-CoV-2 infection.  
247

## 248 **Methods**

### 249 **Cells**

250 Vero (Vero E6, ATCC, Manassas, VA) and Vero-TMPRSS2 [18] cells were  
251 maintained in Dulbecco's Modified Eagle's Medium (DMEM) supplemented with 10% fetal  
252 bovine serum (FBS). Differentiated human nasal and bronchial epithelial cells (nasal ECs  
253 and bronchial ECs) in an ALI-culture were obtained as MucilAir-nasal and  
254 MucilAir-bronchial, and maintained in MucilAir culture medium (all from Epithelix,  
255 Genève, Switzerland). All cells were incubated at 37°C with 5% CO<sub>2</sub>.

256

### 257 **Viruses**

258 SARS-CoV-2 WK-521 (EPI\_ISL\_408667), QK002 (EPI\_ISL\_768526), TY7-501  
259 (EPI\_ISL\_833366) strains were provided by Drs. Saijyo, Shimojima and Ito (National  
260 Institute of Infectious Diseases, Japan); the original stock of these virus strains was  
261 prepared by inoculation of Vero-TMPRSS2 cells. S gene mutant virus clones of WK-521,  
262 del2 and R685H, were isolated as previously described and propagated in Vero cells [18].

263

### 264 **Ethical statement**

265 All of the animal experiments were performed in accordance with the National  
266 University Corporation, Hokkaido University Regulations on Animal Experimentation. The  
267 protocol was reviewed and approved by the Institutional Animal Care and Use Committee  
268 of Hokkaido University (approval no. 20-0060).

269

270 **Hamster infection**

271 For virological and histopathological analyses in single infection, 4- to 6-week-old  
272 male Syrian hamsters (Japan SLC, Shizuoka, Japan) were inoculated intranasally with  
273  $1.5 \times 10^4$  plaque forming units (pfu) of wild-type WK-521 (WT), del2 or R685H viruses in  
274 200  $\mu$ l of PBS. Body weights of the infected hamsters were monitored daily. At 2, 4 or 19  
275 dpi, a subset of the infected hamsters were euthanized under deep anesthesia by isoflurane  
276 inhalation, and tissue samples (nasal turbinate, lung and blood) were harvested.

277 For the reinfection experiments, 4-week-old male Syrian hamsters were inoculated  
278 intranasally with  $1.5 \times 10^4$  pfu of WT, del2 or R685H viruses in 200  $\mu$ l of PBS or PBS only  
279 (mock-infected controls). At 19 or 23 dpi, the hamsters were reinfected with  $1.5 \times 10^5$  pfu  
280 of WT, QK002 or TY7-501 virus strains in 200  $\mu$ l of PBS. At 5 days post reinfection (24 or  
281 28 days post initial infection), tissue samples (nasal turbinate and lung) were harvested.

282 Whole lung and nasal turbinate tissues were homogenized in PBS with TissueRuptor  
283 (Qiagen, Hilden, Germany). A part of the homogenate was centrifuged for 2 min at  $2,310 \times$   
284  $g$  to pellet tissue debris and the supernatant was subjected to plaque assays using  
285 Vero-TMPRSS2 cells for virus titration as previously described [18]. The remaining part of  
286 the homogenate was mixed with TRIzol LS (Invitrogen; Thermo Fisher Scientific,  
287 Waltham, MA) and subjected to RNA extraction with Direct-zol RNA MiniPrep kit (Zymo  
288 Research, Irvine, CA). For relative quantification of viral RNA and host mRNAs, cDNA  
289 was synthesized with SuperScript IV VILO Master Mix (Invitrogen) and analyzed by  
290 qRT-PCR with Probe qPCR Mix (Takara, Kusatsu, Japan). Target RNA levels were

291 normalized to hamster  $\beta$ -actin and calculated by the  $\Delta\Delta C_t$  method. Primers and probes  
292 were previously described and are listed in Table S1 [44, 45].

293

#### 294 **Histopathology and immunohistochemistry**

295 Nasal turbinate and lung tissue samples were harvested from hamsters infected at 2 or  
296 4 dpi of SARS-CoV-2. Tissue samples were fixed in 10% phosphate-buffered formalin and  
297 nasal turbinate were decalcified with 10% EDTA solution (pH 7.0). Tissue samples were  
298 then embedded in paraffin. The paraffin blocks were sectioned at 4  $\mu$ m thickness and  
299 mounted on Platinum PRO micro glass slides (Matsunami, Osaka, Japan). For  
300 histopathological analysis, slides were stained with hematoxylin and eosin (H&E). For  
301 immunohistochemical analysis, slides were heated in citrate buffer for 5 min using a  
302 pressure cooker for antigen retrieval and blocking with Block Ace (KAC, Kyoto, Japan),  
303 followed by staining with anti-SARS-CoV-2 spike antibody (GTX632604, GeneTex,  
304 Hsinchu, Taiwan), anti-SARS-CoV-2 nucleocapsid antibody (GTX635679, GeneTex),  
305 anti-CD3 (ab16669, Abcam, Cambridge, UK), anti-MPO (A039829-2, DAKO; Agilent  
306 Santa Clara, CA) or anti-Iba1 (019-19741, FUJIFILM Wako, Osaka, Japan).  
307 Immunostaining was detected by EnVision system peroxidase-labeled anti-rabbit or  
308 anti-mouse immunoglobulin (DAKO) and visualized with a Histofine diaminobenzidine  
309 substrate kit (Nichirei Biosciences, Tokyo, Japan).

310

#### 311 **Infection and growth of SARS-CoV-2 in *in vitro* cell culture**

312 Human nasal ECs and bronchial ECs in an ALI-culture were infected at the apical  
313 surface with either WT, del2 or R685H viruses at an MOI of 0.1. After 1 h of incubation,  
314 apical area of cells were washed three times with PBS and then cells were maintained under  
315 ALI-culture conditions. At 24, 48, and 72 h post infection (hpi), 200  $\mu$ l of culture medium  
316 was added at the apical side and the fluid was harvested for virus titration after 20 min  
317 incubation. Vero cells were infected with either WT, del2 or R685H viruses at an MOI of  
318 0.01. After 1 h of incubation, cells were washed three times with PBS and then cultured in  
319 fresh medium with 2% FBS. The culture supernatants were harvested at 24, 48 and 72 hpi.  
320 Virus titers were determined by plaque assays as previously described [18]. For viral RNA  
321 quantification, RNA was extracted with Direct-zol RNA MiniPrep kit at 48 hpi (Vero cells)  
322 or 72 hpi (Human nasal ECs and bronchial ECs) and analyzed by qRT-PCR with the  
323 Thunderbird Probe One-step Probe qRT-PCR Kit (Toyobo, Osaka, Japan). Viral RNA  
324 levels were normalized to non-human primate  $\beta$ -actin (Table S1) or human  $\beta$ -actin  
325 (Hs99999903\_m1, Applied Biosystems; Thermo Fisher Scientific) and calculated by the  
326  $\Delta\Delta$ Ct method [46].

327

### 328 **Virus neutralization assays**

329 Serum samples were collected from hamsters at 19 dpi after infection with the  
330 SARS-CoV-2 WK-521 strain and heat-inactivated at 56°C for 30 min. Serial two-fold  
331 dilutions of serum samples in DMEM containing 2% FBS were incubated with 160 pfu of  
332 SARS-CoV-2 WK-521, QK002 or TY7-501 strains at 37°C for 1 h. The serum-virus  
333 mixtures were then add to Vero-TMPRSS2 cells in 96 well plates. After 4 dpi, viral



334 cytopathic effects were examined under an inverted microscope. The neutralization titer  
335 was defined as the reciprocal of the highest serum dilution that completely inhibited the  
336 cytopathic effect.

337

### 338 **Statistical analysis**

339 Data were expressed as the mean  $\pm$ SD. Statistical analysis was performed by One-way  
340 analysis of variance (ANOVA) with Tukey's test using GraphPad Prism 8 (GraphPad Prism  
341 Software, San Diego, CA).

342

### 343 **Role of the funding source**

344 The funders had no role in study design, data collection, data analysis, data interpretation,  
345 or writing of this article.

346 **Acknowledgments**

347 We thank Drs. Saijyo, Shimojima and Ito at National Institute of Infectious Diseases, Japan  
348 for providing SARS-CoV-2 WK-521, QK002, TY7-501 strains. This work was supported  
349 by the Japan Agency for Medical Research and Development (AMED) under Grant  
350 numbers JP21wm0125008, PJ21wm0225003, PJ21fk0108104, PJ20fk0108509 and  
351 PJ20fk0108509, and Scientific Research on Innovative Areas from the Ministry of  
352 Education, Culture, Sports, Science and Technology (MEXT) of Japan under Grant  
353 numbers 16H06429, 16H06431 and 16K21723, and Japan Science and Technology Agency  
354 (JST) Moonshot R&D under Grant numbers JPMJMS2025..

355

356 **Competing interests**

357 The authors S.T., K.U., T.S., and A.S. are employees of Shionogi & Co., Ltd. Other authors  
358 declare no competing interests.

359 **References**

360

361 1. Gubernatorova EO, Gorshkova EA, Polinova AI, Drutskaya MS. IL-6: Relevance  
362 for immunopathology of SARS-CoV-2. *Cytokine Growth Factor Rev.* 2020;53:13-24. Epub  
363 2020/05/20. doi: 10.1016/j.cytogfr.2020.05.009. PubMed PMID: 32475759; PubMed  
364 Central PMCID: PMC7237916.

365 2. Fajgenbaum DC, June CH. Cytokine Storm. *N Engl J Med.*  
366 2020;383(23):2255-73. doi: 10.1056/NEJMra2026131. PubMed PMID: 33264547;  
367 PubMed Central PMCID: PMC7727315.

368 3. Plante JA, Liu Y, Liu J, Xia H, Johnson BA, Lokugamage KG, et al. Spike  
369 mutation D614G alters SARS-CoV-2 fitness. *Nature.* 2021;592(7852):116-21. Epub  
370 2020/10/26. doi: 10.1038/s41586-020-2895-3. PubMed PMID: 33106671.

371 4. Hou YJ, Chiba S, Halfmann P, Ehre C, Kuroda M, Dinno KH, et al.  
372 SARS-CoV-2 D614G variant exhibits efficient replication ex vivo and transmission in vivo.  
373 *Science.* 2020;370(6523):1464-8. Epub 2020/11/12. doi: 10.1126/science.abe8499. PubMed  
374 PMID: 33184236; PubMed Central PMCID: PMC7775736.

375 5. Abdool Karim SS, de Oliveira T. New SARS-CoV-2 Variants - Clinical, Public  
376 Health, and Vaccine Implications. *N Engl J Med.* 2021. Epub 2021/03/24. doi:  
377 10.1056/NEJMc2100362. PubMed PMID: 33761203; PubMed Central PMCID:  
378 PMC8008749.

379 6. Fahlberg MD, Blair RV, Doyle-Meyers LA, Midkiff CC, Zenere G,  
380 Russell-Lodrigue KE, et al. Cellular events of acute, resolving or progressive COVID-19 in  
381 SARS-CoV-2 infected non-human primates. *Nat Commun.* 2020;11(1):6078. Epub  
382 2020/11/27. doi: 10.1038/s41467-020-19967-4. PubMed PMID: 33247138; PubMed

383 Central PMCID: PMCPMC7695721.

384 7. Sia SF, Yan LM, Chin AWH, Fung K, Choy KT, Wong AYL, et al. Pathogenesis  
385 and transmission of SARS-CoV-2 in golden hamsters. *Nature*. 2020;583(7818):834-8. Epub  
386 2020/05/14. doi: 10.1038/s41586-020-2342-5. PubMed PMID: 32408338; PubMed Central  
387 PMCID: PMCPMC7394720.

388 8. Chan JF, Zhang AJ, Yuan S, Poon VK, Chan CC, Lee AC, et al. Simulation of the  
389 Clinical and Pathological Manifestations of Coronavirus Disease 2019 (COVID-19) in a  
390 Golden Syrian Hamster Model: Implications for Disease Pathogenesis and Transmissibility.  
391 *Clin Infect Dis*. 2020;71(9):2428-46. doi: 10.1093/cid/ciaa325. PubMed PMID: 32215622;  
392 PubMed Central PMCID: PMCPMC7184405.

393 9. Rosenke K, Meade-White K, Letko M, Clancy C, Hansen F, Liu Y, et al. Defining  
394 the Syrian hamster as a highly susceptible preclinical model for SARS-CoV-2 infection.  
395 *Emerg Microbes Infect*. 2020;9(1):2673-84. doi: 10.1080/22221751.2020.1858177.  
396 PubMed PMID: 33251966; PubMed Central PMCID: PMCPMC7782266.

397 10. Imai M, Iwatsuki-Horimoto K, Hatta M, Loeber S, Halfmann PJ, Nakajima N, et  
398 al. Syrian hamsters as a small animal model for SARS-CoV-2 infection and countermeasure  
399 development. *Proc Natl Acad Sci U S A*. 2020;117(28):16587-95. Epub 2020/06/22. doi:  
400 10.1073/pnas.2009799117. PubMed PMID: 32571934; PubMed Central PMCID:  
401 PMCPMC7368255.

402 11. Jiang RD, Liu MQ, Chen Y, Shan C, Zhou YW, Shen XR, et al. Pathogenesis of  
403 SARS-CoV-2 in Transgenic Mice Expressing Human Angiotensin-Converting Enzyme 2.  
404 *Cell*. 2020;182(1):50-8.e8. Epub 2020/05/21. doi: 10.1016/j.cell.2020.05.027. PubMed  
405 PMID: 32516571; PubMed Central PMCID: PMCPMC7241398.

406 12. Hassan AO, Case JB, Winkler ES, Thackray LB, Kafai NM, Bailey AL, et al. A

- 407 SARS-CoV-2 Infection Model in Mice Demonstrates Protection by Neutralizing Antibodies.  
408 Cell. 2020;182(3):744-53.e4. Epub 2020/06/10. doi: 10.1016/j.cell.2020.06.011. PubMed  
409 PMID: 32553273; PubMed Central PMCID: PMC7284254.
- 410 13. Johnson BA, Xie X, Bailey AL, Kalveram B, Lokugamage KG, Muruato A, et al.  
411 Loss of furin cleavage site attenuates SARS-CoV-2 pathogenesis. Nature.  
412 2021;591(7849):293-9. Epub 2021/01/25. doi: 10.1038/s41586-021-03237-4. PubMed  
413 PMID: 33494095.
- 414 14. Lee C-Y, Lowen AC. Animal Models for SARS-CoV-2. Current Opinion in  
415 Virology. 2021. doi: <https://doi.org/10.1016/j.coviro.2021.03.009>.
- 416 15. Pandamooz S, Jurek B, Meinung CP, Baharvand Z, Shahem-Abadi AS, Haerteis  
417 S, et al. Experimental Models of SARS-CoV-2 Infection: Possible Platforms to Study  
418 COVID-19 Pathogenesis and Potential Treatments. Annu Rev Pharmacol Toxicol. 2021.  
419 Epub 2021/02/19. doi: 10.1146/annurev-pharmtox-121120-012309. PubMed PMID:  
420 33606962.
- 421 16. Huang Y, Yang C, Xu XF, Xu W, Liu SW. Structural and functional properties of  
422 SARS-CoV-2 spike protein: potential antiviral drug development for COVID-19. Acta  
423 Pharmacol Sin. 2020;41(9):1141-9. Epub 2020/08/03. doi: 10.1038/s41401-020-0485-4.  
424 PubMed PMID: 32747721; PubMed Central PMCID: PMC7396720.
- 425 17. Hoffmann M, Kleine-Weber H, Pöhlmann S. A Multibasic Cleavage Site in the  
426 Spike Protein of SARS-CoV-2 Is Essential for Infection of Human Lung Cells. Mol Cell.  
427 2020;78(4):779-84.e5. Epub 2020/05/01. doi: 10.1016/j.molcel.2020.04.022. PubMed  
428 PMID: 32362314; PubMed Central PMCID: PMC7194065.
- 429 18. Sasaki M, Uemura K, Sato A, Toba S, Sanaki T, Maenaka K, et al. SARS-CoV-2  
430 variants with mutations at the S1/S2 cleavage site are generated in vitro during propagation

- 431 in TMPRSS2-deficient cells. *PLoS Pathog.* 2021;17(1):e1009233. Epub 2021/01/21. doi:  
432 10.1371/journal.ppat.1009233. PubMed PMID: 33476327; PubMed Central PMCID:  
433 PMCPMC7853460.
- 434 19. Lau SY, Wang P, Mok BW, Zhang AJ, Chu H, Lee AC, et al. Attenuated  
435 SARS-CoV-2 variants with deletions at the S1/S2 junction. *Emerg Microbes Infect.*  
436 2020;9(1):837-42. doi: 10.1080/22221751.2020.1756700. PubMed PMID: 32301390;  
437 PubMed Central PMCID: PMCPMC7241555.
- 438 20. Davidson AD, Williamson MK, Lewis S, Shoemark D, Carroll MW, Heesom KJ,  
439 et al. Characterisation of the transcriptome and proteome of SARS-CoV-2 reveals a cell  
440 passage induced in-frame deletion of the furin-like cleavage site from the spike  
441 glycoprotein. *Genome Med.* 2020;12(1):68. Epub 2020/07/28. doi:  
442 10.1186/s13073-020-00763-0. PubMed PMID: 32723359; PubMed Central PMCID:  
443 PMCPMC7386171.
- 444 21. Ogando NS, Dalebout TJ, Zevenhoven-Dobbe JC, Limpens RWAL, van der Meer  
445 Y, Caly L, et al. SARS-coronavirus-2 replication in Vero E6 cells: replication kinetics, rapid  
446 adaptation and cytopathology. *J Gen Virol.* 2020. Epub 2020/06/22. doi:  
447 10.1099/jgv.0.001453. PubMed PMID: 32568027.
- 448 22. Klimstra WB, Tilston-Lunel NL, Nambulli S, Boslett J, McMillen CM, Gilliland  
449 T, et al. SARS-CoV-2 growth, furin-cleavage-site adaptation and neutralization using serum  
450 from acutely infected hospitalized COVID-19 patients. *J Gen Virol.* 2020. Epub 2020/08/21.  
451 doi: 10.1099/jgv.0.001481. PubMed PMID: 32821033.
- 452 23. Liu Z, Zheng H, Lin H, Li M, Yuan R, Peng J, et al. Identification of Common  
453 Deletions in the Spike Protein of Severe Acute Respiratory Syndrome Coronavirus 2. *J*  
454 *Virol.* 2020;94(17). Epub 2020/08/17. doi: 10.1128/JVI.00790-20. PubMed PMID:

- 455 32571797; PubMed Central PMCID: PMC7431800.
- 456 24. Pohl MO, Busnadiego I, Kufner V, Glas I, Karakus U, Schmutz S, et al.  
457 SARS-CoV-2 variants reveal features critical for replication in primary human cells. *PLoS*  
458 *Biol.* 2021;19(3):e3001006. Epub 2021/03/24. doi: 10.1371/journal.pbio.3001006. PubMed  
459 PMID: 33760807.
- 460 25. Zhu Y, Feng F, Hu G, Wang Y, Yu Y, Xu W, et al. A genome-wide CRISPR screen  
461 identifies host factors that regulate SARS-CoV-2 entry. *Nat Commun.* 2021;12(1):961.  
462 Epub 2021/02/11. doi: 10.1038/s41467-021-21213-4. PubMed PMID: 33574281; PubMed  
463 Central PMCID: PMC7878750.
- 464 26. Tay MZ, Poh CM, Rénia L, MacAry PA, Ng LFP. The trinity of COVID-19:  
465 immunity, inflammation and intervention. *Nat Rev Immunol.* 2020;20(6):363-74. Epub  
466 2020/04/28. doi: 10.1038/s41577-020-0311-8. PubMed PMID: 32346093; PubMed Central  
467 PMCID: PMC7187672.
- 468 27. Merad M, Martin JC. Pathological inflammation in patients with COVID-19: a  
469 key role for monocytes and macrophages. *Nat Rev Immunol.* 2020;20(6):355-62. Epub  
470 2020/05/06. doi: 10.1038/s41577-020-0331-4. PubMed PMID: 32376901; PubMed Central  
471 PMCID: PMC7201395.
- 472 28. Lee AC, Zhang AJ, Chan JF, Li C, Fan Z, Liu F, et al. Oral SARS-CoV-2  
473 Inoculation Establishes Subclinical Respiratory Infection with Virus Shedding in Golden  
474 Syrian Hamsters. *Cell Rep Med.* 2020;1(7):100121. Epub 2020/09/22. doi:  
475 10.1016/j.xcrm.2020.100121. PubMed PMID: 32984855; PubMed Central PMCID:  
476 PMC7508015.
- 477 29. Pizzorno A, Padey B, Julien T, Trouillet-Assant S, Traversier A, Errazuriz-Cerda  
478 E, et al. Characterization and Treatment of SARS-CoV-2 in Nasal and Bronchial Human

- 479 Airway Epithelia. *Cell Rep Med*. 2020;1(4):100059. doi: 10.1016/j.xcrm.2020.100059.  
480 PubMed PMID: 32835306; PubMed Central PMCID: PMC7373044.
- 481 30. Kellam P, Barclay W. The dynamics of humoral immune responses following  
482 SARS-CoV-2 infection and the potential for reinfection. *J Gen Virol*. 2020;101(8):791-7.  
483 doi: 10.1099/jgv.0.001439. PubMed PMID: 32430094; PubMed Central PMCID:  
484 PMC7641391.
- 485 31. Chen RE, Zhang X, Case JB, Winkler ES, Liu Y, VanBlargan LA, et al.  
486 Resistance of SARS-CoV-2 variants to neutralization by monoclonal and serum-derived  
487 polyclonal antibodies. *Nat Med*. 2021. Epub 2021/03/04. doi:  
488 10.1038/s41591-021-01294-w. PubMed PMID: 33664494.
- 489 32. Garcia-Beltran WF, Lam EC, St Denis K, Nitido AD, Garcia ZH, Hauser BM, et  
490 al. Multiple SARS-CoV-2 variants escape neutralization by vaccine-induced humoral  
491 immunity. *Cell*. 2021. Epub 2021/03/21. doi: 10.1016/j.cell.2021.03.013. PubMed PMID:  
492 33743213; PubMed Central PMCID: PMC7953441.
- 493 33. Li Q, Nie J, Wu J, Zhang L, Ding R, Wang H, et al. SARS-CoV-2 501Y.V2  
494 variants lack higher infectivity but do have immune escape. *Cell*. 2021. Epub 2021/03/19.  
495 doi: 10.1016/j.cell.2021.02.042. PubMed PMID: 33735608; PubMed Central PMCID:  
496 PMC7901273.
- 497 34. Supasa P, Zhou D, Dejnirattisai W, Liu C, Mentzer AJ, Ginn HM, et al. Reduced  
498 neutralization of SARS-CoV-2 B.1.1.7 variant by convalescent and vaccine sera. *Cell*. 2021.  
499 Epub 2021/03/22. doi: 10.1016/j.cell.2021.02.033. PubMed PMID: 33743891.
- 500 35. Hoffmann M, Arora P, Groß R, Seidel A, Hörnich BF, Hahn AS, et al.  
501 SARS-CoV-2 variants B.1.351 and P.1 escape from neutralizing antibodies. *Cell*. 2021.  
502 Epub 2021/03/20. doi: 10.1016/j.cell.2021.03.036. PubMed PMID: 33794143; PubMed



503 Central PMCID: PMCPMC7980144.

504 36. Muus C, Luecken MD, Eraslan G, Sikkema L, Waghray A, Heimberg G, et al.  
505 Single-cell meta-analysis of SARS-CoV-2 entry genes across tissues and demographics.  
506 Nat Med. 2021;27(3):546-59. Epub 2021/03/02. doi: 10.1038/s41591-020-01227-z.  
507 PubMed PMID: 33654293.

508 37. Schuler BA, Habermann AC, Plosa EJ, Taylor CJ, Jetter C, Negretti NM, et al.  
509 Age-determined expression of priming protease TMPRSS2 and localization of  
510 SARS-CoV-2 in lung epithelium. J Clin Invest. 2021;131(1). doi: 10.1172/JCI140766.  
511 PubMed PMID: 33180746; PubMed Central PMCID: PMCPMC7773394.

512 38. Li F, Han M, Dai P, Xu W, He J, Tao X, et al. Distinct mechanisms for TMPRSS2  
513 expression explain organ-specific inhibition of SARS-CoV-2 infection by enzalutamide.  
514 Nat Commun. 2021;12(1):866. Epub 2021/02/08. doi: 10.1038/s41467-021-21171-x.  
515 PubMed PMID: 33558541; PubMed Central PMCID: PMCPMC7870838.

516 39. Winstone H, Lista MJ, Reid AC, Bouton C, Pickering S, Galao RP, et al. The  
517 Polybasic Cleavage Site in SARS-CoV-2 Spike Modulates Viral Sensitivity to Type I  
518 Interferon and IFITM2. J Virol. 2021;95(9). Epub 2021/04/12. doi: 10.1128/JVI.02422-20.  
519 PubMed PMID: 33563656.

520 40. Mykytyn AZ, Breugem TI, Riesebosch S, Schipper D, van den Doel PB, Rottier  
521 RJ, et al. SARS-CoV-2 entry into human airway organoids is serine protease-mediated and  
522 facilitated by the multibasic cleavage site. Elife. 2021;10. Epub 2021/01/04. doi:  
523 10.7554/eLife.64508. PubMed PMID: 33393462; PubMed Central PMCID:  
524 PMCPMC7806259.

525 41. Hajj Hussein I, Chams N, Chams S, El Sayegh S, Badran R, Raad M, et al.  
526 Vaccines Through Centuries: Major Cornerstones of Global Health. Front Public Health.

527 2015;3:269. Epub 2015/11/26. doi: 10.3389/fpubh.2015.00269. PubMed PMID: 26636066;  
528 PubMed Central PMCID: PMCPMC4659912.

529 42. Zhou D, Chan JF, Zhou B, Zhou R, Li S, Shan S, et al. Robust SARS-CoV-2  
530 infection in nasal turbinates after treatment with systemic neutralizing antibodies. *Cell Host*  
531 *Microbe*. 2021. Epub 2021/02/25. doi: 10.1016/j.chom.2021.02.019. PubMed PMID:  
532 33657424; PubMed Central PMCID: PMCPMC7904446.

533 43. Wong YC, Lau SY, Wang To KK, Mok BWY, Li X, Wang P, et al. Natural  
534 transmission of bat-like SARS-CoV-2 PRRA variants in COVID-19 patients. *Clin Infect*  
535 *Dis*. 2020. Epub 2020/07/10. doi: 10.1093/cid/ciaa953. PubMed PMID: 32649739;  
536 PubMed Central PMCID: PMCPMC7454488.

537 44. Shirato K, Nao N, Katano H, Takayama I, Saito S, Kato F, et al. Development of  
538 Genetic Diagnostic Methods for Detection for Novel Coronavirus 2019(nCoV-2019) in  
539 Japan. *Jpn J Infect Dis*. 2020;73(4):304-7. Epub 2020/02/18. doi:  
540 10.7883/yoken.JJID.2020.061. PubMed PMID: 32074516.

541 45. Zivcec M, Safronetz D, Haddock E, Feldmann H, Ebihara H. Validation of assays  
542 to monitor immune responses in the Syrian golden hamster (*Mesocricetus auratus*). *J*  
543 *Immunol Methods*. 2011;368(1-2):24-35. Epub 2011/02/17. doi: 10.1016/j.jim.2011.02.004.  
544 PubMed PMID: 21334343; PubMed Central PMCID: PMCPMC3085612.

545 46. Overbergh L, Kyama CM, Valckx D, Debrock S, Mwenda JM, Mathieu C, et al.  
546 Validation of real-time RT-PCR assays for mRNA quantification in baboons. *Cytokine*.  
547 2005;31(6):454-8. doi: 10.1016/j.cyto.2005.07.002. PubMed PMID: 16129617.

548

549

550

## 551 **Figure Legends**

### 552 **Fig 1. Growth of SARS-CoV-2 S gene mutants in Syrian hamsters**

553 (A) Nascent full-length S protein is cleaved into S1 and S2 subunits at the S1/S2 cleavage  
554 site. Multiple amino acid sequence alignments were focused on the S1/S2 cleavage site of  
555 wild-type (WT) and S gene mutants (del2 and R685H). The arrowhead indicates the  
556 cleavage site. (B) Syrian hamsters were infected with SARS-CoV-2 WT or S gene mutants  
557 (del2 and R685H) via the intranasal route. Mean of body weight changes of mock- or  
558 virus-infected hamsters ( $n = 12$  per group) was monitored daily. (C and E) Infectious titers  
559 in nasal turbinate (C) and lung (E) of hamsters at 4 days post infection (dpi). Viral titers in  
560 the cultures were determined using plaque assays. (D and F) Viral RNA levels relative to  
561 the WT virus in nasal turbinate (D) and lung (F) of Syrian hamsters at 4 dpi. The viral RNA  
562 levels were quantified by qRT-PCR and normalized to the expression levels of  $\beta$ -actin.  
563 One-way analysis of variance with Tukey's test was used to determine the statistical  
564 significance of the differences in virus titers between the WT and S gene mutants.  $*p <$   
565  $0.05$ ,  $**p < 0.01$ ,  $***p < 0.001$ .

566

### 567 **Fig 2. Pathological changes and immune response in lung tissues of hamsters infected** 568 **with SARS-CoV-2 S gene mutants**

569 (A) Gross pathologic images of the lungs of hamsters infected with WT or S gene mutants  
570 at 4 days post infection (dpi). (B) Histopathological images of lungs of hamsters infected  
571 with WT or S gene mutants at 4 dpi with H&E staining. Scale bars = 500  $\mu$ m. (C)  
572 Immunohistochemistry for SARS-CoV-2 N protein, macrophage (Iba1), T cell (CD3) and

573 neutrophil (MPO) markers. Cell nuclei were counterstained by hematoxylin. Scale bars =  
574 100  $\mu\text{m}$ . (D–G) Cytokine gene expression profile in lung tissues from hamsters at 4 dpi.  
575 Relative gene expression levels of indicated cytokines in the lungs as compared with lungs  
576 from mock-infected hamsters were examined by qRT-PCR. Data were normalized to  
577  $\beta$ -actin. One-way analysis of variance with Tukey's test was used to determine the  
578 statistical significance of the differences.  $**p < 0.01$ ,  $***p < 0.001$ .

579

580 **Fig 3. Growth of SARS-CoV-2 S gene mutants in *in vitro* cell culture.**

581 (A, C, E) Growth curves of SARS-CoV-2 WT or S gene mutants in Vero cells (A), primary  
582 human nasal epithelial cells (C), and bronchial epithelial cells (E). Viral titers in the  
583 cultures were determined using a plaque assay. (B, D, F) Viral RNA levels relative to WT  
584 virus in Vero cells (B), primary human nasal epithelial cells (D), and bronchial epithelial  
585 cells (F) at 48 h post infection. The viral RNA levels were normalized to the expression  
586 levels of  $\beta$ -actin. One-way analysis of variance with Tukey's test was used to determine the  
587 statistical significance of the differences between the WT and S gene mutants.  $*p < 0.05$ ,  
588  $**p < 0.01$ ,  $***p < 0.001$ .

589

590 **Fig 4. Reinfection of hamsters with SARS-CoV-2 WK-521 WT**

591 (A) Neutralizing antibody titers in hamster serum at 19 dpi with WT or S gene mutants. (B)  
592 Schematic of primary infection, reinfection and sampling. Hamsters were infected  
593 intranasally with  $1.5 \times 10^4$  pfu of WT or S gene mutants. At 19 days post initial infection,  
594 hamsters were reinfected with  $1.5 \times 10^5$  pfu of WT virus. Mock-inoculated hamsters

595 (Mock–Mock) and primary-infected hamsters (Mock–WT) were used as controls. (C) Mean  
596 of body weight changes of hamsters from 0 to 5 days post-reinfection. Sample sizes were  $n$   
597 = 4 for the Mock–Mock group and  $n = 8$  for the other groups. (D) Gross pathologic images  
598 of lungs of hamsters at 5 days post-reinfection. (E and F) Infectious virus titers in nasal  
599 turbinates (E) and lungs (F) of hamsters at 5 days post-reinfection. Viral titers in the  
600 cultures were determined using plaque assays. (G and H) Viral RNA levels relative to  
601 primary-infected hamsters (Mock–WT) in nasal turbinates (G) and lungs (H) of hamsters at  
602 5 days post-reinfection. The viral RNA levels were quantified by qRT-PCR and normalized  
603 to the expression levels of  $\beta$ -actin. (I-L) Relative gene expression levels of indicated  
604 cytokines in lungs as compared with lungs from mock-infected hamsters (Mock–Mock)  
605 were examined by qRT-PCR. Data were normalized to  $\beta$ -actin. One-way analysis of  
606 variance with Tukey's test was used to determine the statistical significance of the  
607 differences.  $**p < 0.01$ ,  $***p < 0.001$ .

608

609 **Fig 5. Cross-reactive neutralization among SARS-CoV-2 lineage A and lineage P.1. in**  
610 **hamsters**

611 (A) Cross-neutralization test using SARS-CoV-2 TY7-501 variant (lineage P1) and hamster  
612 sera at 19 days post infection (dpi) with WT or S gene mutants of SARS-CoV-2 WK-521  
613 (lineage A). (B) Schematic of primary infection, reinfection and sampling. Hamsters were  
614 inoculated intranasally with  $1.5 \times 10^4$  pfu of WK-521 del2 mutant or PBS. At 23 days post  
615 primary infection, hamsters were infected with  $1.5 \times 10^5$  pfu of TY7-501 variant.  
616 Mock-infected hamsters (Mock–Mock) and primary-infected hamsters (Mock-TY7) were

617 used as controls. (C) Mean of body weight changes of hamsters from 0 to 5 days  
618 post-reinfection. Sample sizes were  $n = 4$  for all groups. (D) Gross pathologic images of  
619 lungs of hamsters at 5 days post-reinfection. (E and F) Infectious virus titers in nasal  
620 turbinates (E) and lungs (F) of hamsters at 5 days post-reinfection. Viral titers in the  
621 cultures were determined using plaque assays. (G and H) Viral RNA levels relative to  
622 primary-infected hamsters (Mock-TY7) in nasal turbinates (G) and lungs (H) of hamsters at  
623 5 days post-reinfection. The viral RNA levels were quantified by qRT-PCR and normalized  
624 to the expression levels of  $\beta$ -actin. (I-L) Relative gene expression levels of indicated  
625 cytokines in the lungs as compared with lungs from mock-infected hamsters (Mock–Mock)  
626 were examined by qRT-PCR. Data were normalized to  $\beta$ -actin. One-way analysis of  
627 variance with Tukey's test was used to determine the statistical significance of the  
628 differences.  $**p < 0.01$ ,  $***p < 0.001$ .

629

630 **Fig S1. Viral antigen-positive cells in hamsters at 2 day post infection.**

631 Immunohistochemistry of SARS-CoV-2 N in nasal turbinates (A) and lungs (B) at 2 days  
632 post infection (dpi) of SARS-CoV-2 WK-521 WT or S gene mutants. Cell nuclei were  
633 counterstained with hematoxylin. Scale bars = 100  $\mu$ m.

634

635 **Fig S2. Cross-reactive neutralization among SARS-CoV-2 lineage A and lineage**  
636 **B.1.1.7 in hamsters**

637 (A) Cross-neutralization test using SARS-CoV-2 QK002 variant (lineage B.1.1.7) and  
638 hamster sera at 19 days post infection (dpi) with WT or S gene mutants of SARS-CoV-2

639 WK-521 (lineage A). (B) Schematic representation of primary infection, reinfection and  
640 sampling. Hamsters were inoculated intranasally with  $1.5 \times 10^4$  pfu of WK-521 del2 mutant  
641 or PBS. At 23 days post primary infection, hamsters were infected with  $1.5 \times 10^5$  pfu of  
642 QK002 variant. Mock-infected hamsters (Mock–Mock) and primary-infected hamsters  
643 (Mock-QK002) were used as controls. Mock–Mock hamsters are the same individuals as  
644 those represented in Fig.4. (C) Mean of body weight changes of hamsters from 0 to 5 days  
645 post-reinfection. Sample sizes were  $n = 4$  for all groups. (D) Gross pathologic images of  
646 lungs of hamsters at 5 days post-reinfection. (E and F) Infectious virus titers in nasal  
647 turbinates (E) and lungs (F) of hamsters at 5 days post-reinfection. Viral titers in the  
648 cultures were determined using plaque assays. (G and H) Viral RNA levels relative to  
649 primary-infected hamsters (Mock-QK002) in nasal turbinates (G) and lungs (H) of  
650 hamsters at 5 days post-reinfection. The viral RNA levels were quantified by qRT-PCR and  
651 normalized to the expression levels of  $\beta$ -actin. (I-L) Relative gene expression levels of  
652 indicated cytokines in lungs compared with lungs from mock-infected hamsters  
653 (Mock–Mock) were examined by qRT-PCR. Data were normalized to  $\beta$ -actin. One-way  
654 analysis of variance with Tukey's test was used to determine the statistical significance of  
655 the differences.  $**p < 0.01$ ,  $***p < 0.001$ .

656

657 **Fig S3. Multiple amino acid sequence alignment of S protein of SARS-CoV-2**

658 Multiple sequence alignment based on the full length of the deduced S protein sequence of  
659 WK521 (lineage A), QK002 (lineage B.1.1.7) and TY7-501 (lineage P.1.). Amino acid

660 substitutions and deletions in QK002 and TY7-501 are shown as pink and green boxes,  
661 respectively.



# Figure 1

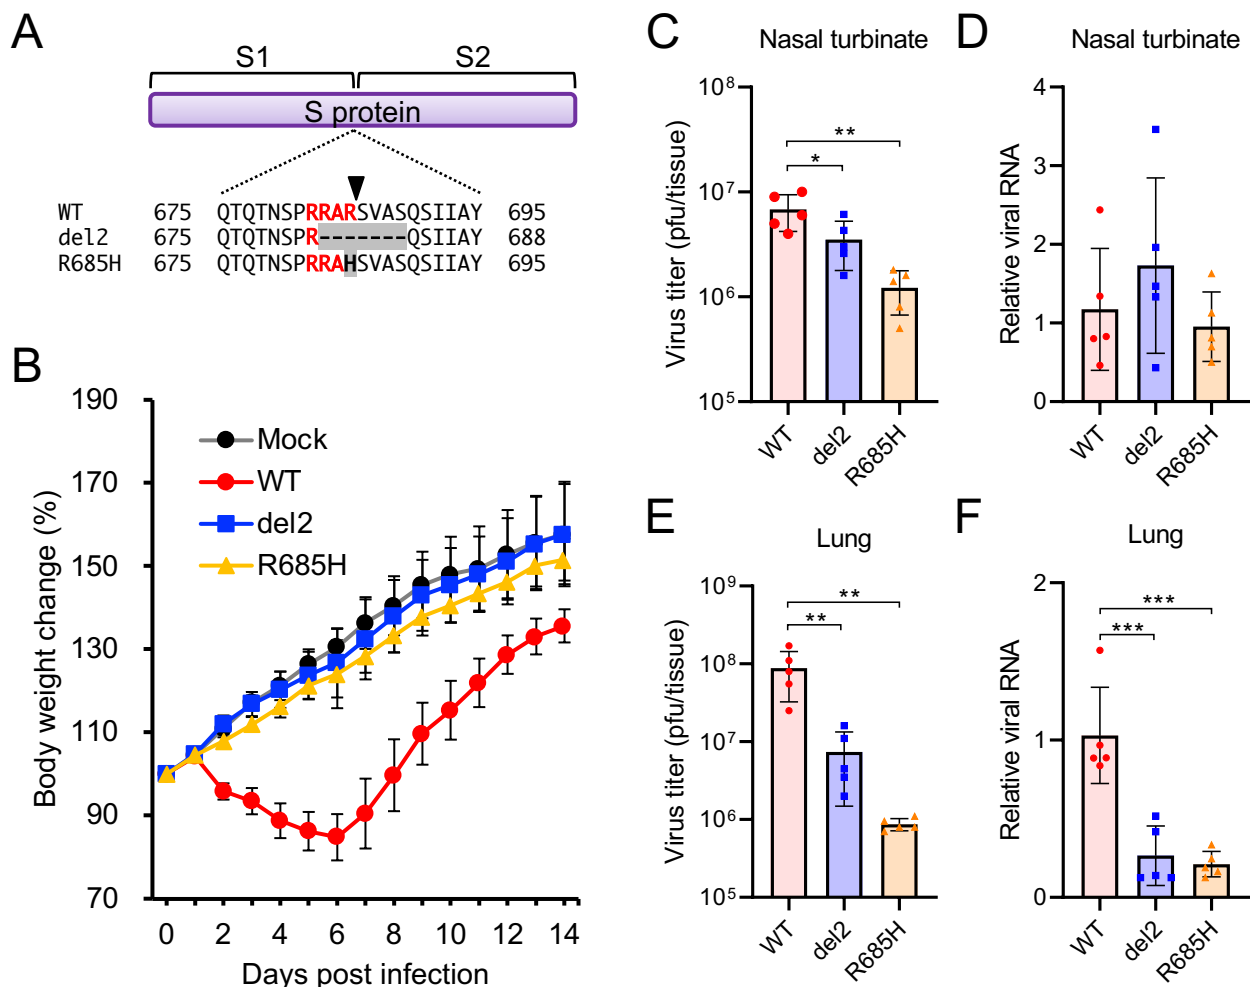

# Figure 2

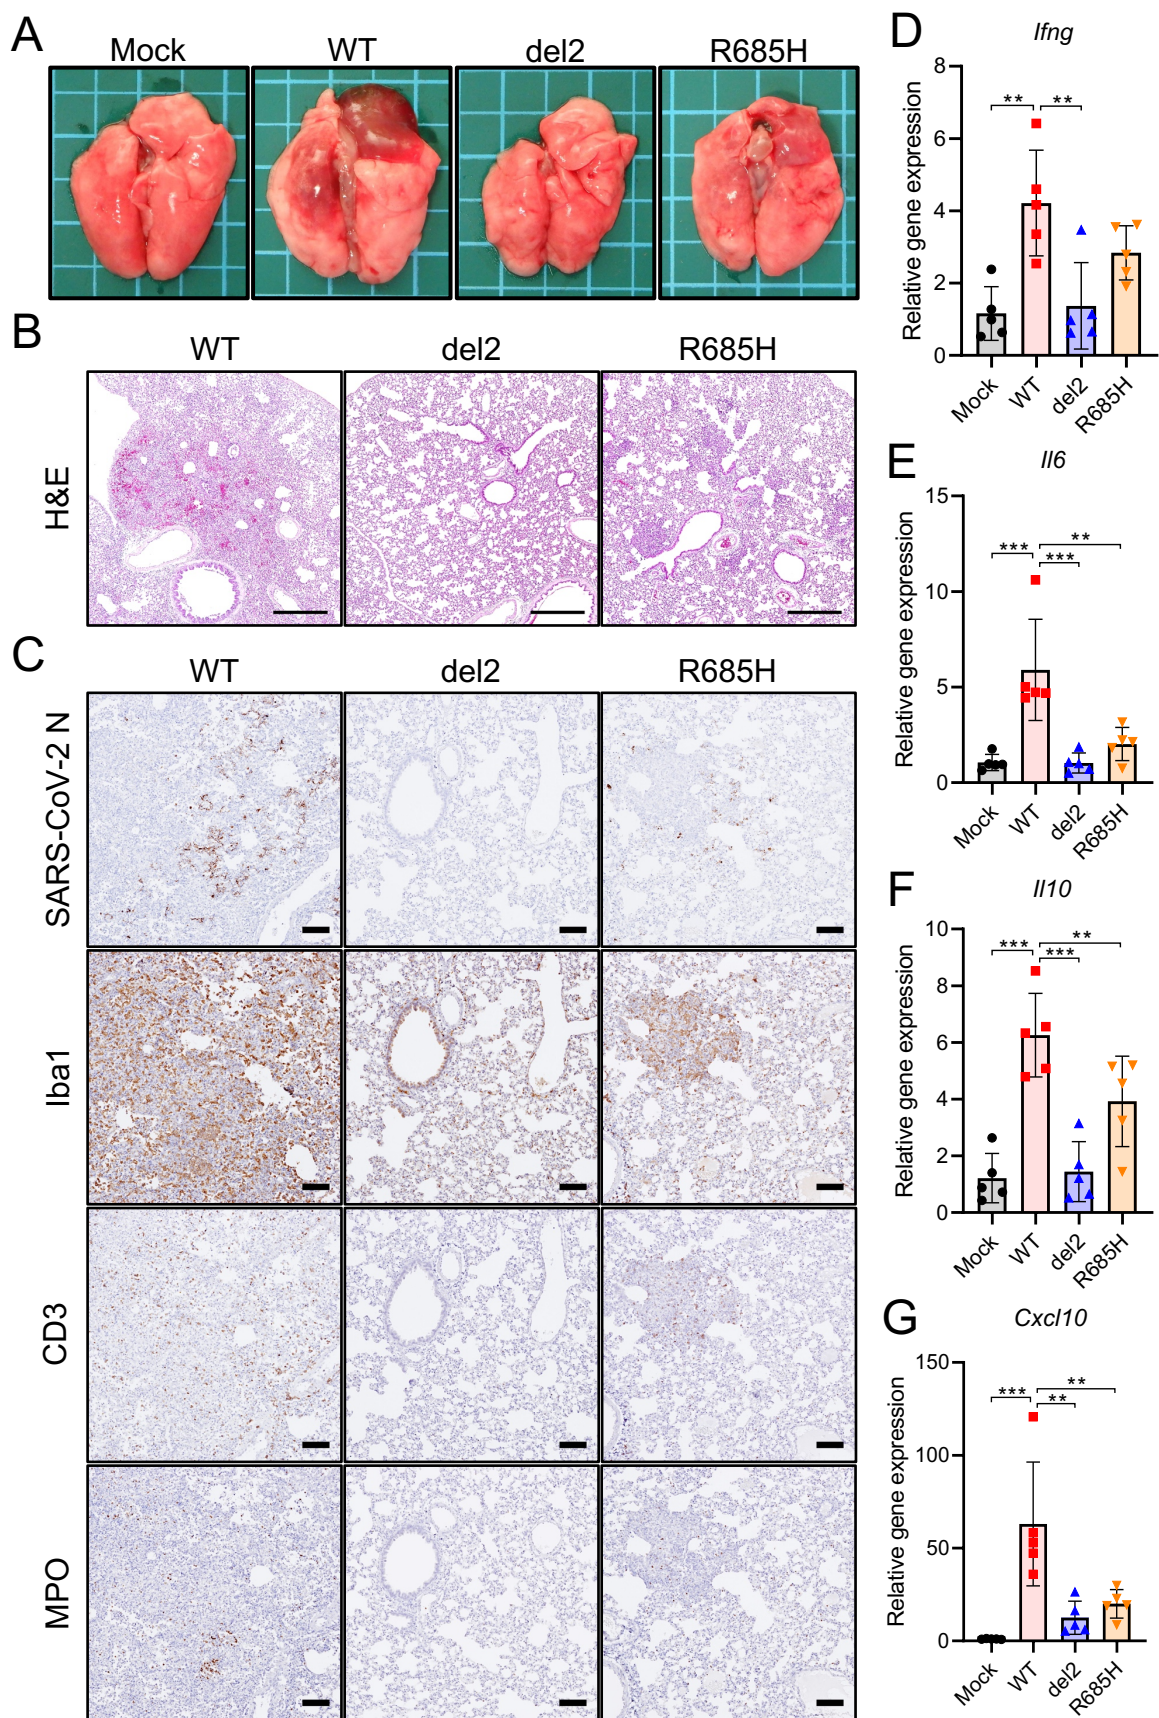

# Figure 3

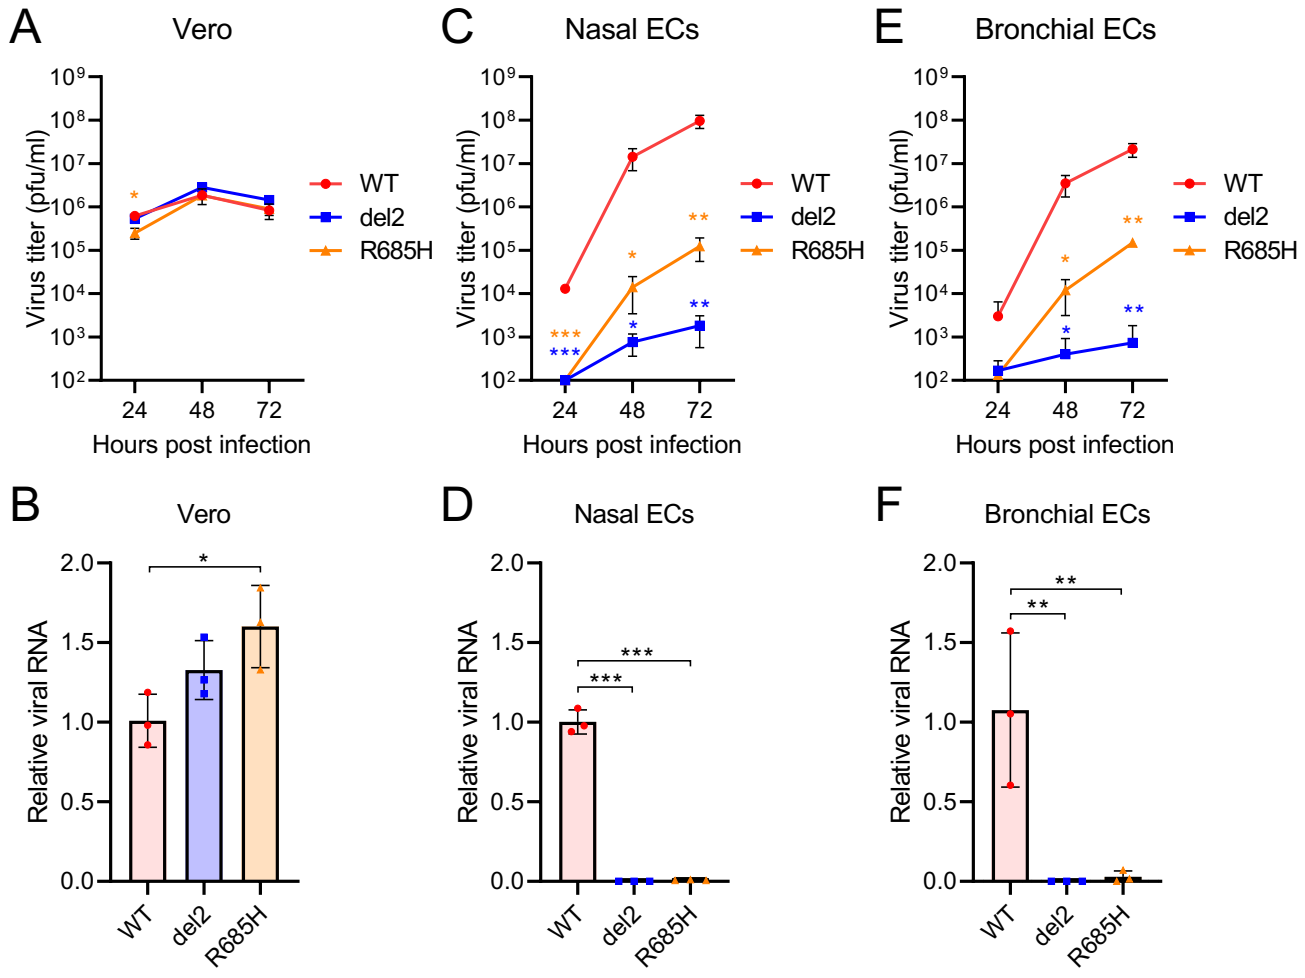

# Figure 4

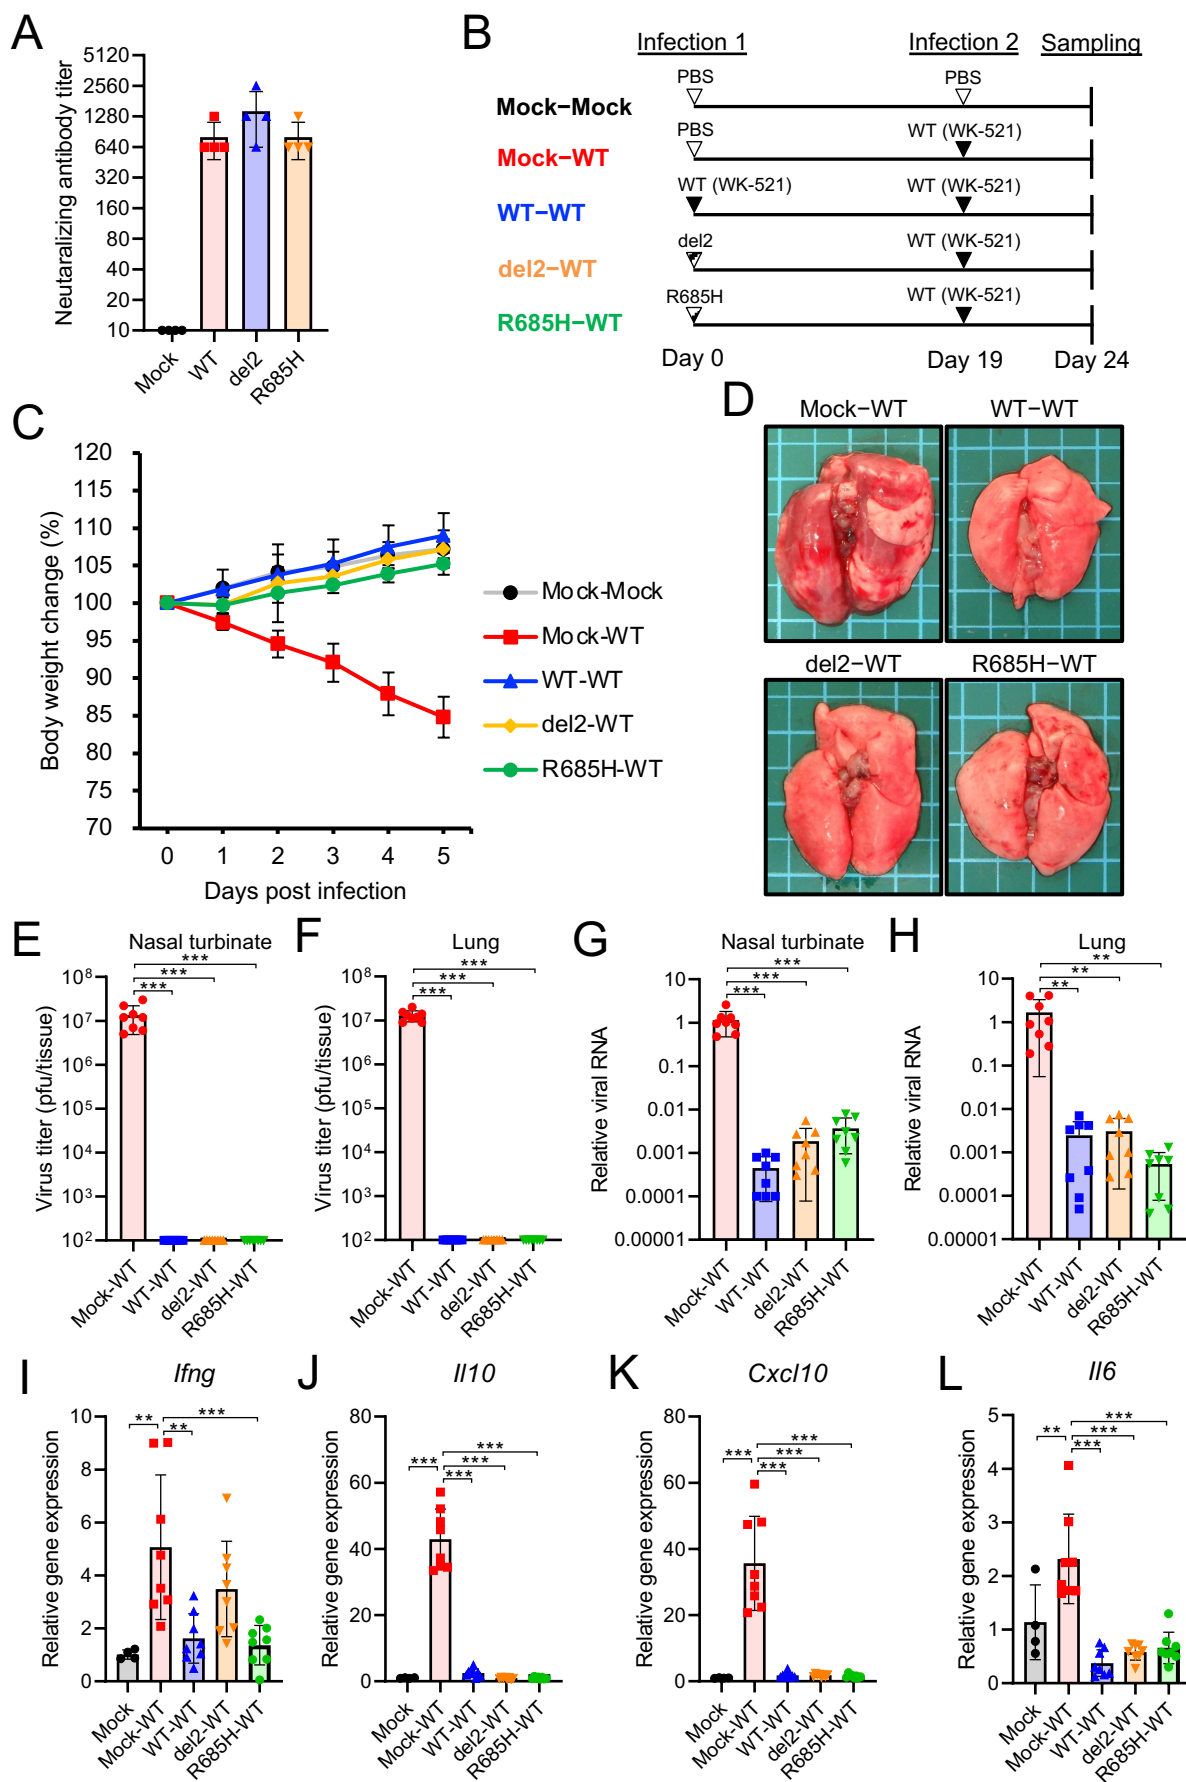

# Figure 5

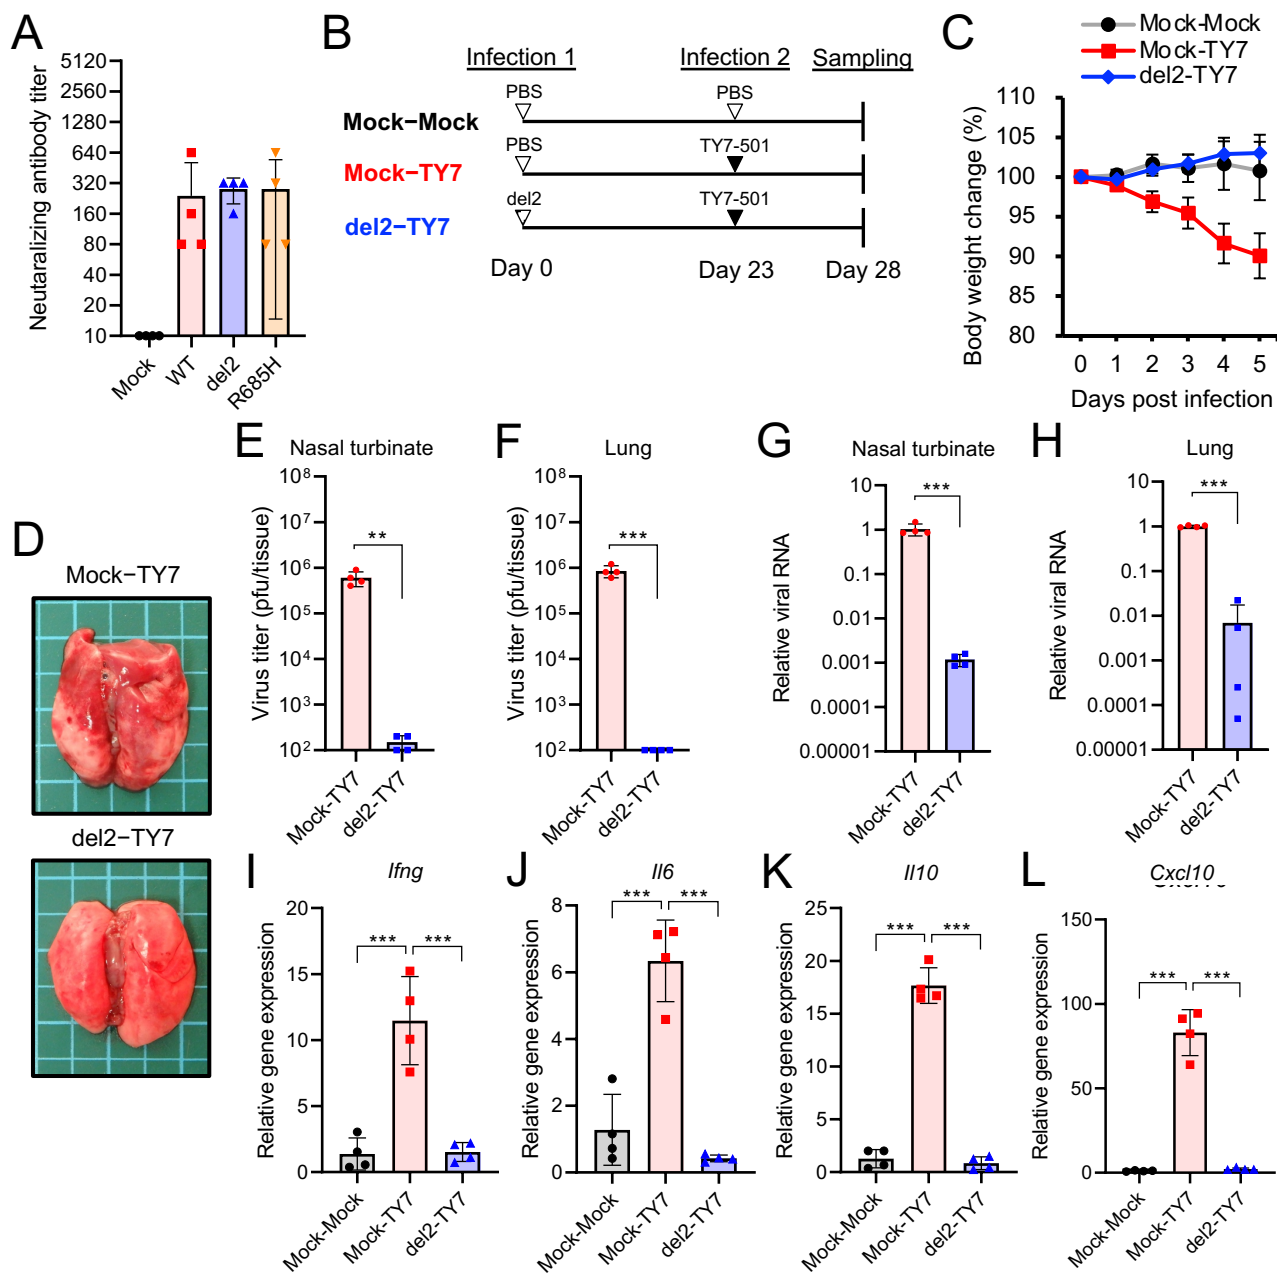

Source: http://biorxiv.org/content/10.1101/2021.04.29.442060v1.full.pdf
